# Supplementary material for: Video captioning with stacked attention and semantic hard pull
Source: PeerJ Comput Sci. 2021 Aug 5;7:e664. doi: 10.7717/peerj-cs.664 (PMC8356660; doi:10.7717/peerj-cs.664)
Supplement: Supplemental Information 1 — Each sheet corresponds to a different model architecture. The name of each sheet denotes the architecture details. In each sheet, each row corresponds to a particular sample from the validation set, and each column represents the corresponding epoch. The values in each cell are the corresponding SS scores. [file peerj-cs-07-664-s001.xlsx]

## Sheet: Single LSTM with Attn (45 hard 
1 Attention 45	5	10	15	20	25	30	35	40
Sample 1		0.5		0.5		0.5		0
Sample 2		0.75		0		0		0
Sample 3		0.165		0.165		0		0
Sample 4		0.125		0		0.5		0
Sample 5		0		0		0		0
Sample 6		0.625		0.625		0.625		1
Sample 7		0.75		0.5		0.625		0.625
Sample 8		0.5		0.5		0.5		0.5
Sample 9		0.75		0.75		1		1
Sample 10		0.165		0.165		0.165		0.165
Sample 11		0		0		0		0
Sample 12		0.5		1		1		1
Sample 13		0.25		0.25		0.25		0.25
Sample 14		0		0.5		0.5		0.5
Sample 15		0		0		0		0
Sample 16		0		0		0		0
Sample 17		0.75		0.25		1		1
Sample 18		0		0		0		0
Sample 19		0		0.5		0.5		0.5
Sample 20		0		0		0		0
Sample 21		1		0.25		0.665		0.665
Sample 22		0		0		0		0
Sample 23		0.125		0.125		0		0.125
Sample 24		0.165		0.165		0.165		0.165
Sample 25		0		0		0		0.25
Sample 26		0.1875		0.1875		0.1875		0.1875
Sample 27		0.5		0.5		0.5		0.875
Sample 28		0.708		0.208		0.208		0
Sample 29		0.5		0.5		0.5		0.5
Sample 30		0.75		0.25		0.25		0.25
Sample 31		0.208		0.208		0.208		0.208
Sample 32		0		0.25		0.25		0.25
Sample 33		0		0.208		0.167		0.208
Sample 34		0.75		0.75		0.75		0.75
Sample 35		0.25		0.25		0.375		0.375
Sample 36		0.1875		0.1875		0.1875		0.1875
Sample 37		0.357		0		0.5		0.357
Sample 38		0.708		0.5		0.5		0
Sample 39		0.5		0		0		0
Sample 40		0.208		0		0.208		0.208
Sample 41		0.75		0.75		0.75		0.75
Sample 42		0		0		0.25		0.25
Sample 43		0.333		0.333		0.333		0
Sample 44		0.25		0.75		0.75		0.75
Sample 45		0		0		0		0
Sample 46		0.25		0.25		0.25		0.25
Sample 47		0.5		0.5		0.5		0
Sample 48		0		0		0		0
Sample 49		0		0		0		0
Sample 50		0.75		0.75		0.75		0.75
		0.31534		0.27154		0.32738		0.29702

## Sheet: Dual LSTM with Single Attn (45 
2 NoStack 45	5	10	15	20	25	30	35	40
Sample 1		0		0		0		0
Sample 2
Sample 3		0		0		0		0
Sample 4		0.25		0.25		0.25		0.25
Sample 5		0.25		0.375		0.375		0
Sample 6		0.165		0.165		0.165		0.165
Sample 7		0		0.125		0.125		0.125
Sample 8
Sample 9		0.33		0.75		0.33		0.75
Sample 10		0		0		0		0
Sample 11
Sample 12		0.165		0.165		0.165		0.165
Sample 13		0.625		0.625		0.625		0.625
Sample 14		0.75		0.25		0.25		0.25
Sample 15		0		0		0		0
Sample 16
Sample 17
Sample 18
Sample 19
Sample 20
Sample 21		0		0.83		0		0
Sample 22		0.25		0.25		0.25		0.25
Sample 23
Sample 24		0		0		0.5		0.75
Sample 25		0.75		0.75		0.75		1
Sample 26		0.375		0.375		0.375		0.375
Sample 27
Sample 28
Sample 29		0.208		0.208		0.208		0.208
Sample 30		0.175		0.175		0.175		0.3
Sample 31		0.25		0.75		0.75		0.75
Sample 32
Sample 33		0		0.125		0		0.5
Sample 34		0.75		0.75		0.75		0.75
Sample 35		0		0		0		0
Sample 36
Sample 37		0		0		0		0
Sample 38		0.167		0.333		0		0
Sample 39		0		0		0		0
Sample 40		0.5		0.5		0.5		0.5
Sample 41		0.25		0.25		0.25		0.208
Sample 42		0.5		0.5		0.5		0
Sample 43		0		0		0		0
Sample 44
Sample 45		0		0.25		0.25		0
Sample 46		0		0.333		0		0
Sample 47
Sample 48
Sample 49
Sample 50
		6.71		9.084		7.543		7.921

## Sheet: (SSVC) Dual LSTM with Stacked A
2 Stack 45	5	10	15	20	25	30	35	40
Sample 1		0		0		0.75		0
Sample 2		0.75		0.75		0.5		0.5
Sample 3		0.165		0.165		0.25		0.165
Sample 4		0.125		0.5		0.25		0.25
Sample 5		0.25		0		0		0
Sample 6		0		0		0		0
Sample 7		0		0		0.375		0.375
Sample 8		0.5		0.665		0.83		0.83
Sample 9		0.165		0.165		0.33		1
Sample 10		0.25		0.5		0.5		0.25
Sample 11		0		0		0		0
Sample 12		0		0		0		0.25
Sample 13		0.75		0		0		0.35
Sample 14		0.25		0.625		0.125		0.5625
Sample 15		0		0		0		0
Sample 16		1		1		1		0.8325
Sample 17		0.75		0.75		1		0.75
Sample 18		0.25		0		0		0.25
Sample 19		0.375		0.375		0.375		0.375
Sample 20		0.75		0.75		0.75		0.75
Sample 21		0.625		0.625		0.625		0.625
Sample 22		0.5		0.5		1		0.5
Sample 23		0.583		0.583		0.416		0.667
Sample 24		0.187		0.187		0.187		0
Sample 25		0.792		0.875		0.25		0.938
Sample 26		0		0.625		0.437		0.437
Sample 27		0		0.333		0		0
Sample 28		0.75		0.75		0.75		0.75
Sample 29		0		0		0		0
Sample 30		0.5		0.875		0.875		0.5
Sample 31		0.333		0.333		0		0
Sample 32		0.75		0.75		1		1
Sample 33		0		0		0.5		0.5
Sample 34		0.5		0.875		0.5		0.5
Sample 35		0		0		0.1875		0.541
Sample 36		0.208		0.208		0.208		0.333
Sample 37		0.375		0.375		0.375		0.375
Sample 38		0.875		0.5		0		0
Sample 39		0.25		0.208		0.25		0.25
Sample 40		0.792		0.875		0.6875		0.937
Sample 41		0.75		0.75		0.75		0.75
Sample 42		0.125		0.125		0.25		1
Sample 43		0		0		0		0
		0.35407		0.385977		0.378674		0.420767

## Sheet: Triple LSTM with Stacked Attn (
	5	10	15	20	25	30	35	40
Sample 0		0.83		0.83		0.375		0.375
Sample 1		0.167		0.167		0		0
Sample 2		0.5		0.5		0		0
Sample 3		0.25		0.625		0		0
Sample 4		0		0		0		0
Sample 5		0		0		0		0.25
Sample 6		0		0		0		0
Sample 7		0		0		0.67		0.625
Sample 8		0		0		0		0
Sample 9		0.67		0.5		0.5		0
Sample 10		0.75		0.75		0.75		0.75
Sample 11		0		0		0		0
Sample 12		0		0		0		0
Sample 13		0.75		0.75		0.75		0.75
Sample 14		0.75		0.75		0.75		0.75
Sample 15		0		0		0.75		0.58
Sample 16		0		0		0		0
Sample 17		0.125		0.125		0.125		0.125
Sample 18		0.125		0.125		0.125		0.125
Sample 19		0		0		0		0
Sample 20		0		0		0		0
Sample 21		0.5		0.5		0.5		0
Sample 22		0.67		0		0		0.67
Sample 23		0.67		0.167		0.625		0.625
Sample 24		0		0		0.5		0
Sample 25		0.75		0.75		0.75		0.75
Sample 26		0.208		0		0.333		0.166
Sample 27		1		0.666		0.333		1
Sample 28		0		0		0		0
Sample 29		0.25		0.375		0.25		0.375
Sample 30		0		0		0		0
Sample 31		0		0		0		0.833
Sample 32		0.5		0.25		0.25		0.25
Sample 33		1		0.708		0.708		1
Sample 34		0.25		0.25		0.25		0
Sample 35		0.175		0.175		0		0
Sample 36		0.5		0		0		0.25
Sample 37		0		0.25		0.25		0.25
Sample 38		0		0		0		0
Sample 39		0		0		0		0
Sample 40		0.25		0.25		0.25		0
Sample 41		0.208		0.666		0.666		0.666
Sample 42		0		0		0		0
Sample 43		1		0.666		0.145		0.145
Sample 44		0		0		0		0
Sample 45		0.25		0.5		0.75		0.75
Sample 46		0.666		0.416		0.416		0.166
Sample 47		0.5		0		0		0
Sample 48		0		0		0		0
Sample 49		0		0		0		0
		0.28528		0.23422		0.23542		0.24452

## Sheet: Dual LSTM with Stacked Attn (0 
2 Stack 0	5	10	15	20	25	30	35	40
Sample 1		0.625		0.75		0.5		0
Sample 2		0		0		0		0
Sample 3		0		0		0		0
Sample 4		0		0		0		0
Sample 5		0.45		0.75		0.165		0.33
Sample 6		0		0		0.75		0.75
Sample 7		0.665		0.665		0.665		0.665
Sample 8		0.165		0.165		0.165		0.165
Sample 9		0.75		0.663		0.663		0.75
Sample 10		0.25		0.25		0.25		0.25
Sample 11		0.665		0.83		0.665		0.665
Sample 12		0.165		0.165		0.165		0.165
Sample 13		0.415		0.415		0.25		0.415
Sample 14		0		0.125		0.125		0.125
Sample 15
Sample 16		0		0		0		0
Sample 17
Sample 18
Sample 19
Sample 20		0.75		0.75		0.75		1
Sample 21		0		0		0		0
Sample 22		0.165		0		0.75		0
Sample 23
Sample 24		0.665		0.75		0		0
Sample 25		0		0		0		0
Sample 26
Sample 27		0.25		0.25		0.25		0.25
Sample 28		0.25		0.25		0.25		0.25
Sample 29		0.375		0.375		0.25		0.375
Sample 30		0.375		0.375		0.208		0.375
Sample 31		0		0		0		0
Sample 32		0.75		0.75		0.75		0.75
Sample 33
Sample 34
Sample 35
Sample 36
Sample 37		0.208		0.5625		0.5625		0.5625
Sample 38
Sample 39
Sample 40
Sample 41		0.1875		0		0		0
Sample 42
Sample 43
Sample 44
Sample 45		0.208		0.416		0.208		0.208
Sample 46
Sample 47		0.5		0.5		1		0.875
Sample 48
Sample 49		0.208		0.916		0.333		0.167
Sample 50
		9.0415		10.6725		9.6745		9.0925

## Sheet: Dual LSTM with Stacked Attn (60
2 Stack 60	5	10	15	20	25	30	35	40
Sample 1		0		0.165		0		0
Sample 2		0.165		0.165		0.165		0.165
Sample 3		0		0		0		0
Sample 4		0.75		0.75		0.75		0.665
Sample 5		0		0		0		0
Sample 6		0.75		0.75		0.75		0.75
Sample 7		0.25		0.25		0.25		0.25
Sample 8		0		0		0		0
Sample 9		0.125		0.125		0.125		0.125
Sample 10		0.5		1		1		1
Sample 11		0.75		0.665		0.75		0.75
Sample 12		0		0		0		0
Sample 13		0.165		0.165		0.165		0.165
Sample 14		0		0.165		0.165		0.165
Sample 15		0.415		0.415		0		0.415
Sample 16		0.75		0.75		0.75		0.75
Sample 17		1		1		0.83		0.83
Sample 18		0		0		0		0
Sample 19		0.25		0.25		0.25		0.25
Sample 20		0.5		0.25		0.5		0.25
Sample 21		0		0		0		0
Sample 22		0		0		0		0
Sample 23		0		0		0		0
Sample 24		0.25		0.25		0.25		0.25
Sample 25		0.415		0.415		0.415		0.415
Sample 26		0		0		0		0
Sample 27		0		0		0		0
Sample 28		0		0		0		0
Sample 29		0.75		0.25		0.25		0.75
Sample 30		0.333		0.208		0.292		0.208
Sample 31		0		0.208		0		0.25
Sample 32		0		0		0		0
Sample 33		0		0		0		0
Sample 34		0.25		0.9375		0.792		0.9375
Sample 35		0		0.25		0.25		0
Sample 36		0		0		0		0
Sample 37		0.25		0.25		0.25		0.25
Sample 38		0.208		0.208		0.208		0.208
Sample 39		0		0		0		0
Sample 40		0		0.75		0		0
Sample 41		0.375		0.375		0		0.375
Sample 42		0		0.1875		0.1875		0.1875
Sample 43		0.75		1		1		0.75
Sample 44		0.208		0.208		0.333		0.208
Sample 45		0.1875		0.375		0.9375		0.9375
Sample 46		0.208		0.1875		0.1875		0.333
Sample 47		0.1875		0.1875		0.1875		0.1875
Sample 48		0.1875		0.1875		0.1875		0.1875
Sample 49		0.375		0.375		0.375		0.375
Sample 50		0.9375		0.9375		0.6875		0.6458
		0.24484		0.29224		0.2648		0.279706
